# Supplementary material
Source: PubMed Central journal article supplement (PMC3038623)
Supplement: NIHMS228404-supplement-Table_2.pdf [file NIHMS228404-supplement-Table_2.pdf]

**Supplementary Table 2. No significant changes in hotspot mutation frequencies in *p53*<sup>-/-</sup> versus wt mice**

| <b>Nos. in Table 2A</b> | <b><u>WRC</u><sup>a</sup></b> | <b><u>GYW</u><sup>a</sup></b> |
|-------------------------|-------------------------------|-------------------------------|
| 1+3+5 vs 2+4+6          | 0.10                          | 0.08                          |
| 8+9 vs 10+11            | 0.11                          | 0.22                          |
| 7 vs 8                  | 0.22                          | 0.17                          |

<sup>a</sup>p value is calculated using Fisher's exact test. Thus, the targeting frequencies of the C in WRC and the G in GYW are the same in *p53* wt (#1, 3, 5) versus *p53*<sup>-/-</sup> (#2, 4, 6) mice, in *ung*<sup>-/-</sup> (#8, 9) versus *p53*<sup>-/-</sup>*ung*<sup>-/-</sup> (#10, 11) mice, and in *ung* wt (#7) versus *ung*<sup>-/-</sup> (#8) mice.
